# Supplementary material for: Elucidation of transformation pathway of ketoprofen, ibuprofen, and furosemide in surface water and their occurrence in the aqueous environment using UHPLC-QTOF-MS
Source: PubMed Central journal article supplement (PMC4026630; doi:10.1007/s00216-014-7614-1), 2014-01-23
Supplement: 216_2014_7614_MOESM1_ESM.pdf [file 216_2014_7614_MOESM1_ESM.pdf]

Analytical and Bioanalytical Chemistry

Electronic Supplementary Material

**Elucidation of transformation pathway of ketoprofen, ibuprofen, and furosemide in surface water and their occurrence in the aqueous environment using UHPLC-QTOF-MS**

A. Jakimska, M. Śliwka-Kaszyńska, J. Reszczyńska, J. Namieśnik, A. Kot-Wasik

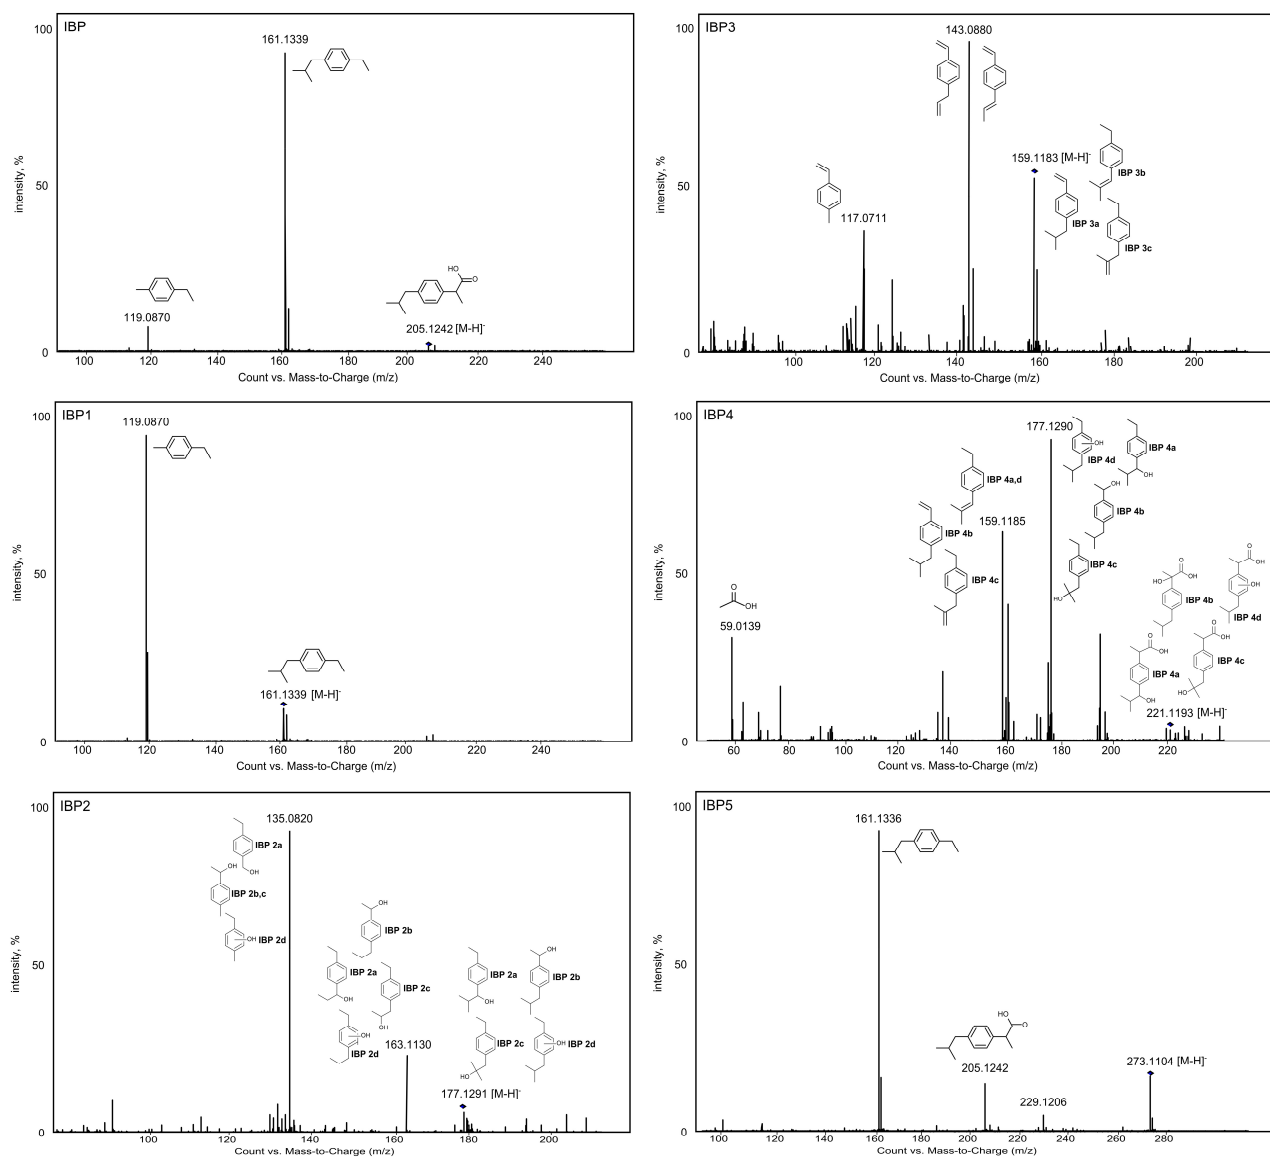

**Fig. S1.** Mass spectra obtained for ibuprofen and its TPs during the photodegradation experiment

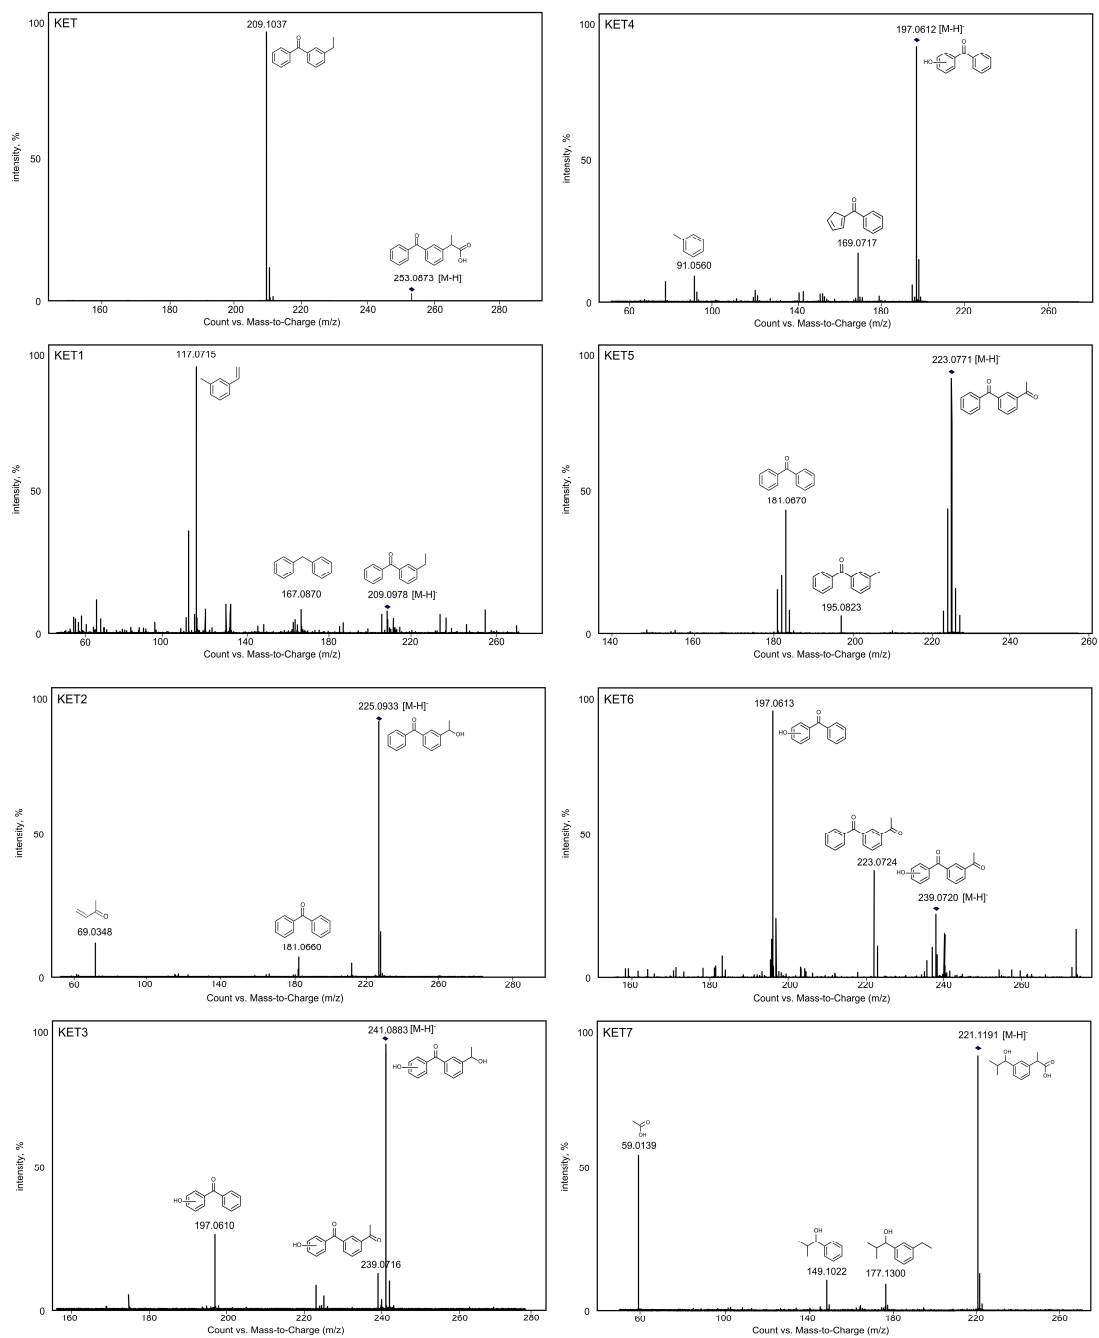

**Fig. S2.** Mass spectra obtained for ketoprofen and its TPs during the photodegradation experiment

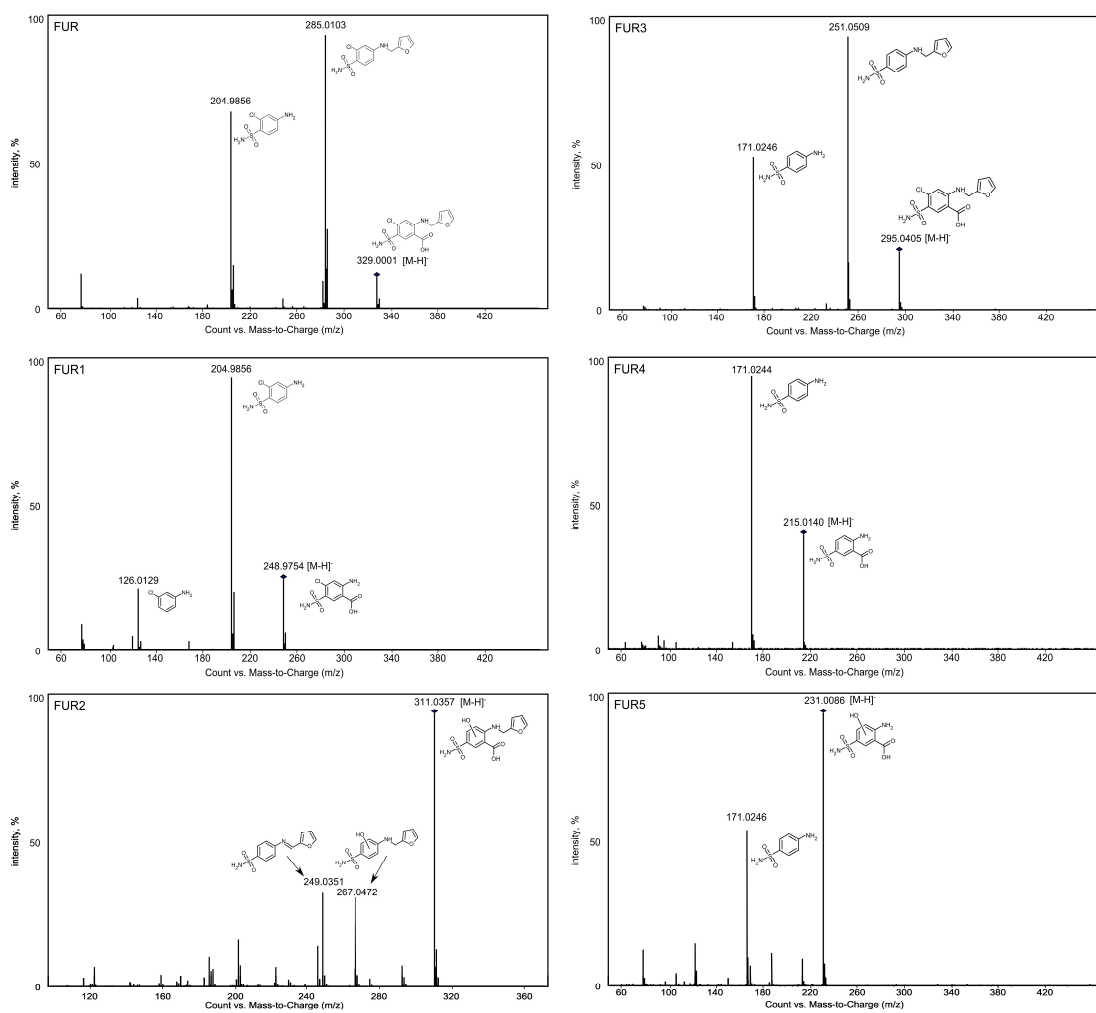

**Fig. S3.** Mass spectra obtained for furosemide and its TPs during the photodegradation experiment
